# Supplementary material for: Neutrophil recruitment limited by high-affinity bent β2 integrin binding ligand in cis
Source: PubMed Central journal article supplement (PMC5013657; doi:10.1038/ncomms12658), 2016-08-31
Supplement: ncomms12658-s1.pdf [file ncomms12658-s1.pdf]

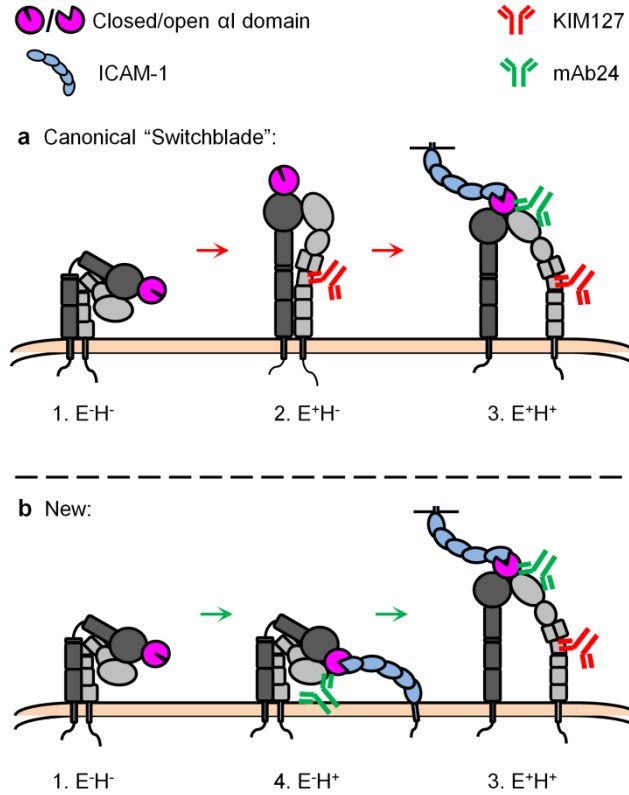

### Supplementary Figure 1

Two activation pathways and four conformations of  $\beta_2$  integrins. KIM127 (red) can specifically detect integrin extension ( $E^+$ ) and mAb24 (green) can specifically detect headpiece-opening ( $H^+$ ). **(a)** Canonical switchblade pathway:  $E^-H^-$  (**1**,  $KIM127^-mAb24^-$ )  $\rightarrow$   $E^+H^-$  (**2**,  $KIM127^+mAb24^-$ ),  $\rightarrow$   $E^+H^+$  (**3**,  $KIM127^+mAb24^+$ ); **(b)** Proposed new pathway:  $E^-H^-$  (**1**,  $KIM127^-mAb24^-$ )  $\rightarrow$   $E^-H^+$  (**4**,  $mAb24^+KIM127^-$ )  $\rightarrow$   $E^+H^+$  (**3**,  $KIM127^+mAb24^+$ ).

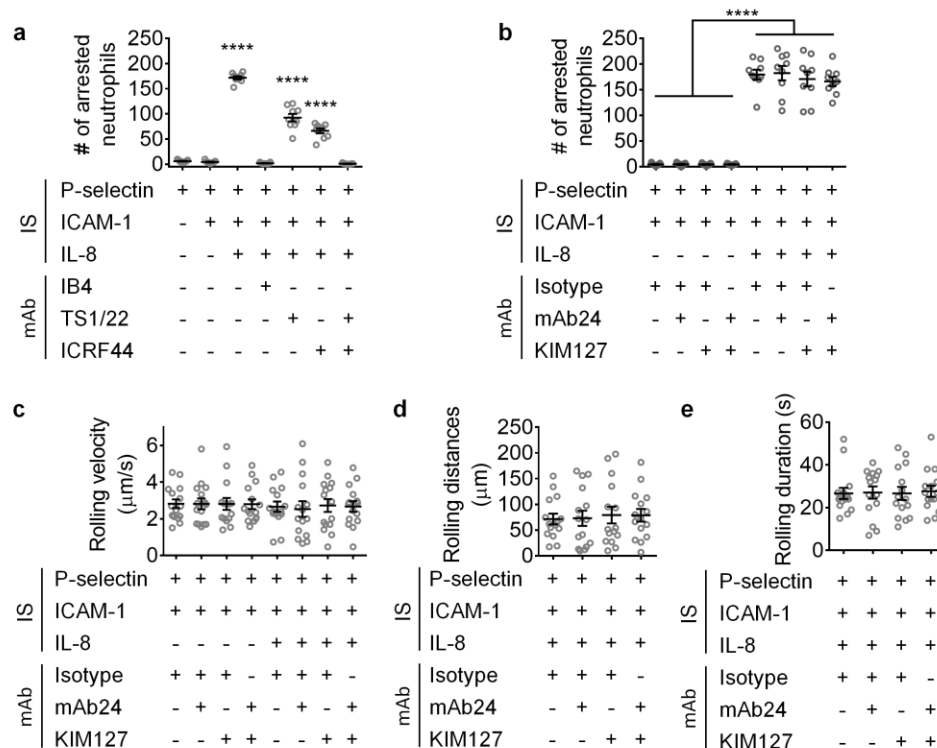

## Supplementary Figure 2

Neutrophils roll on P-selectin and arrest when ICAM-1 and IL-8 are co-immobilized. Isolated primary human neutrophils ( $5 \times 10^6$  cells/ml) were perfused through the microfluidic device over a substrate coated with recombinant human P-selectin-Fc with or without recombinant human ICAM-1-Fc and IL-8 under shear stress of  $6 \text{ dyn/cm}^2$ . IS – immobilized substrate; mAb – soluble monoclonal antibodies. (a) Adhesion –blocking anti-CD11a (TS1/22), anti-CD11b (ICRF44), and anti-CD18 (IB4) mAbs ( $10 \text{ } \mu\text{g/ml}$  each) were added to the cell suspension, incubated for 20 minutes at RT and then perfused with the cells as described previously<sup>49</sup>. (b-e) Neutrophils were incubated (3 min, RT, same as that used in homogeneous binding qDF imaging) with isotype control mAbs ( $10 \text{ } \mu\text{g/ml}$ ), mAb24/isotype ( $5 \text{ } \mu\text{g/ml}$  each), KIM127/isotype ( $5 \text{ } \mu\text{g/ml}$  each) and mAb24/KIM127 ( $5 \text{ } \mu\text{g/ml}$  each) prior to perfusion.  $n = 9$  observations in b,  $n = 15$  cells per group in c-e. The mean values (bars) and SEMs (error bars) are presented. \*\*\*\* $p < 0.0001$  in the unpaired student t-test.

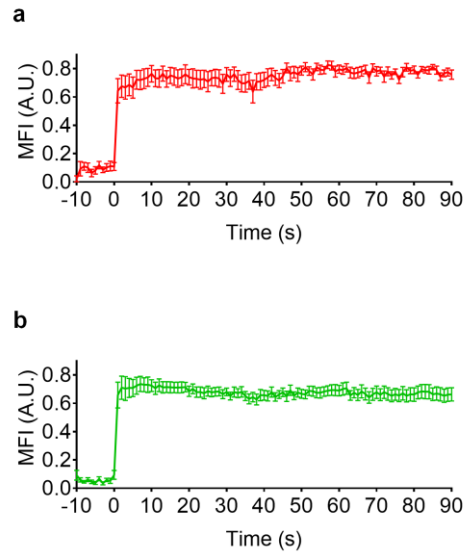

### Supplementary Figure 3

Binding kinetics of KIM127-DL550 (**a**, red) and mAb24-DL488 (**b**, green) in qDF microscopy imaging. Unlabeled neutrophils ( $2.5 \times 10^6$  cells/ml) were perfused through the complete substrate (P-selectin/ICAM-1/IL-8) for 5 minutes to allow them arrest. Then the cells were fixed by PFA. After washing with PBS for 5 minutes, the KIM127-DL550 and mAb24-DL488 ( $5 \mu\text{g/ml}$  each) antibodies were perfused to record the binding kinetics. MFI of both KIM127-DL550 and mAb24-DL488 on the cell footprints ( $n=16$  cells) in the recorded time-lapse images were obtained. The binding of the antibodies is very fast as expected (reaching  $>90\%$  of maximum binding within 1 second).

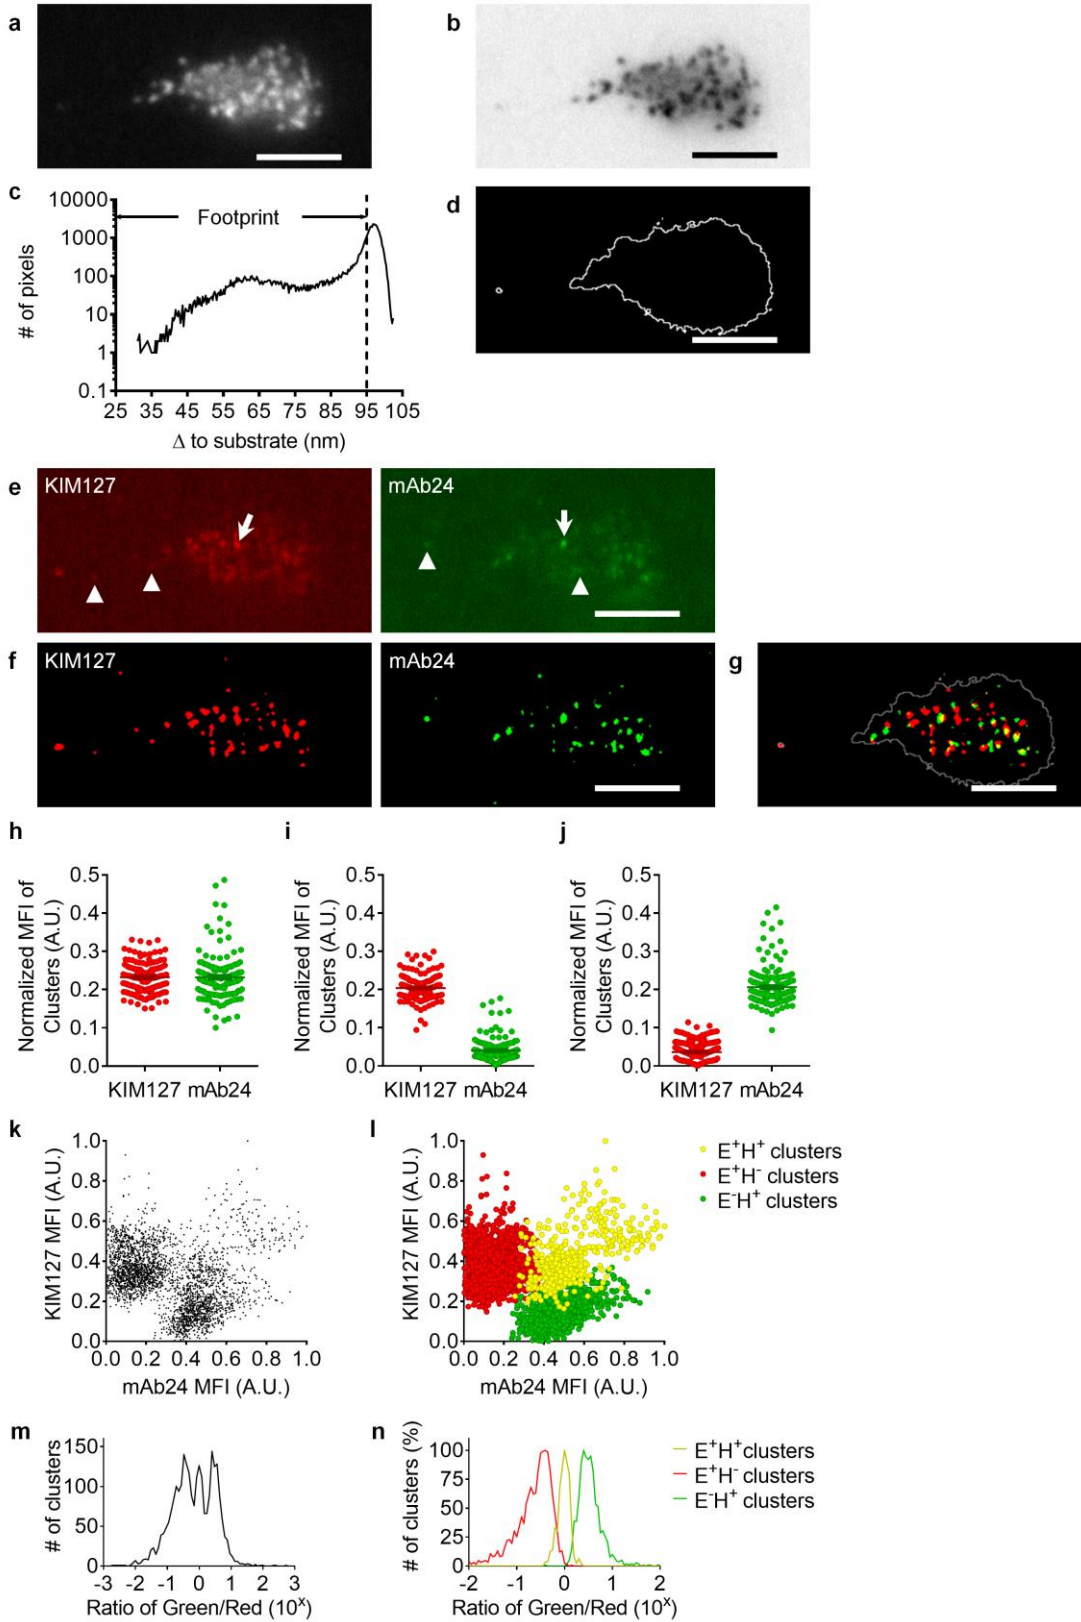

#### Supplementary Figure 4

Image processing: generation of neutrophil footprint outline and binary cluster images. **(a)** Raw fluorescence image of cell membrane labeled with CellMask DeepRed. **(b)** Distance between the membrane and the substrate ( $\Delta$ ) calculated from the fluorescence intensity of cell membrane dye as described previously<sup>33</sup> to get the  $\Delta$  map. **(c)** Pixel histogram. The dashed line identifies the footprint as being closer than 95 nm from the substrate. **(d)** Outline of the neutrophil footprint. **(e)** Raw image of KIM127-DL550 and mAb24-DL488. **(f)** Using “Smart Segmentation” in ImagePro (see methods), we generated binary cluster images, which identify both bright (arrows in **e**) and dim (arrow-heads in **e**) clusters in raw images. **(g)** The final binary cluster images only show the integrin clusters on cell footprints (grey outline). Scale bars in A, B and D-G are 5  $\mu\text{m}$ . **(h-j)** MFI of KIM127-DL550 (red) and mAb24-DL488 (green) in  $\text{E}^+\text{H}^+$  (**h**),  $\text{E}^+\text{H}^-$  (**i**) and  $\text{E}^-\text{H}^+$  (**j**) clusters. In each frame, clusters were classified and their DL550 and DL488 fluorescence intensities were averaged, resulting in three data points (**h, j, k**) per frame. The mean values (bars) and SEMs (error bars) are presented.  $\text{MFI} = (\text{intensity} - \text{background}) / (\text{maximum} - \text{background})$ . **(k-l)** 2D plot KIM127 MFI (y-axis) vs mAb24 MFI (x-axis) of the 2506 clusters analyzed. Uncolored (**k**) and colored (**l**) plot showed that  $\text{E}^+\text{H}^-$  (red),  $\text{E}^-\text{H}^+$  (green) and  $\text{E}^+\text{H}^+$  (yellow) clusters clearly separated. **(m-n)** Histogram showing the ratio of mAb24 MFI vs KIM127 MFI of the 2506 clusters analyzed. Uncolored (**m**) and colored (**n**) histograms showed individual peaks for the  $\text{E}^+\text{H}^-$  (red),  $\text{E}^-\text{H}^+$  (green) and  $\text{E}^+\text{H}^+$  (yellow) clusters.

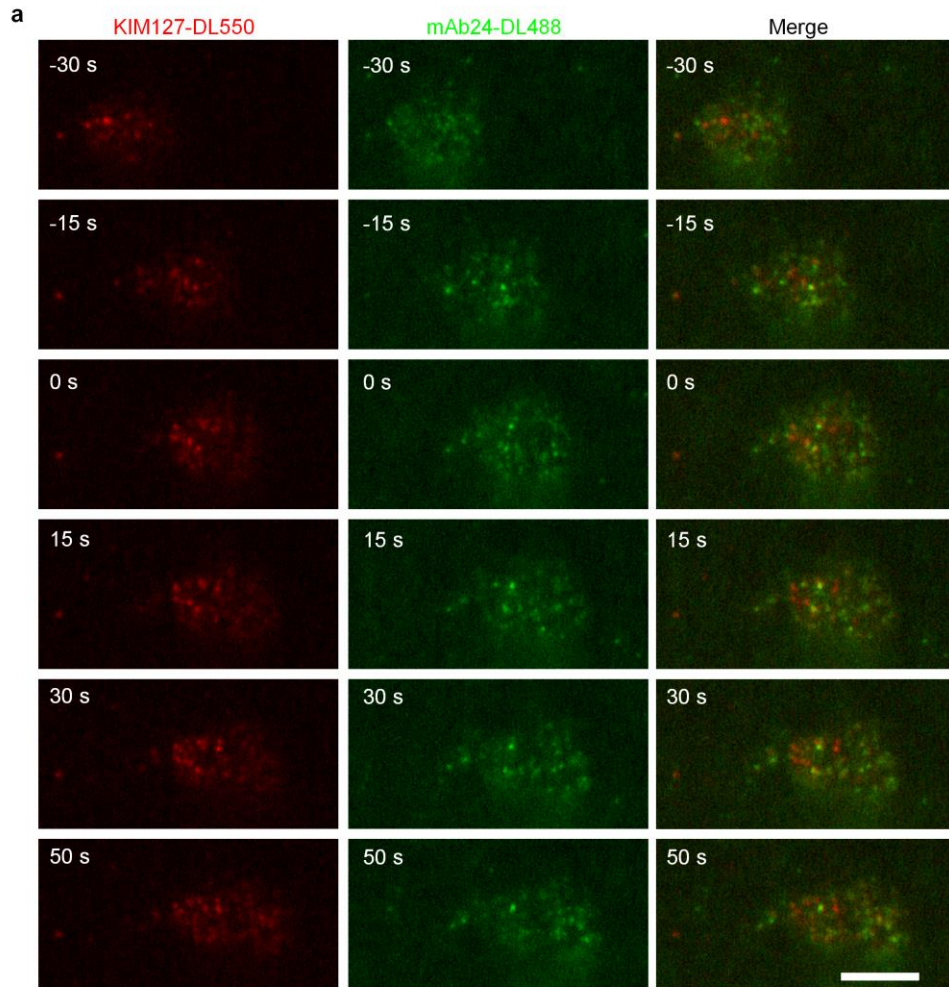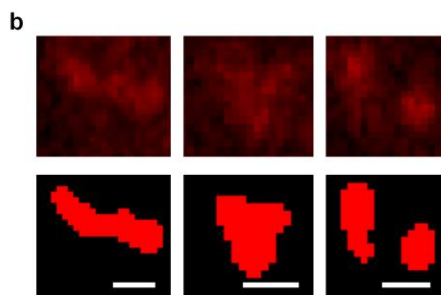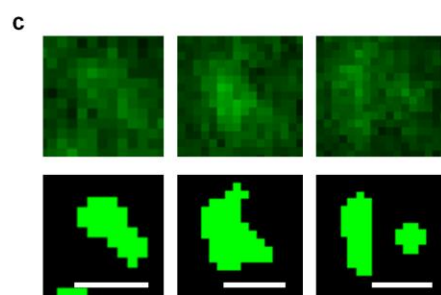

### **Supplementary Figure 5**

Raw fluorescence images showing the  $\beta_2$  integrin extension (KIM127) and headpiece-opening (mAb24) on human neutrophil footprint during rolling on P-selectin/ICAM-1/IL-8 substrate. **(a)** Raw fluorescence images used to generate Figure 1d-f. Scale bar 5  $\mu\text{m}$ . **(b-c)** Comparison of raw fluorescence images and processed binary images for typical KIM127 **(b)** or mAb24 **(c)** clusters. Cluster morphologies are preserved in binary clusters. Scale bar 0.5  $\mu\text{m}$ .

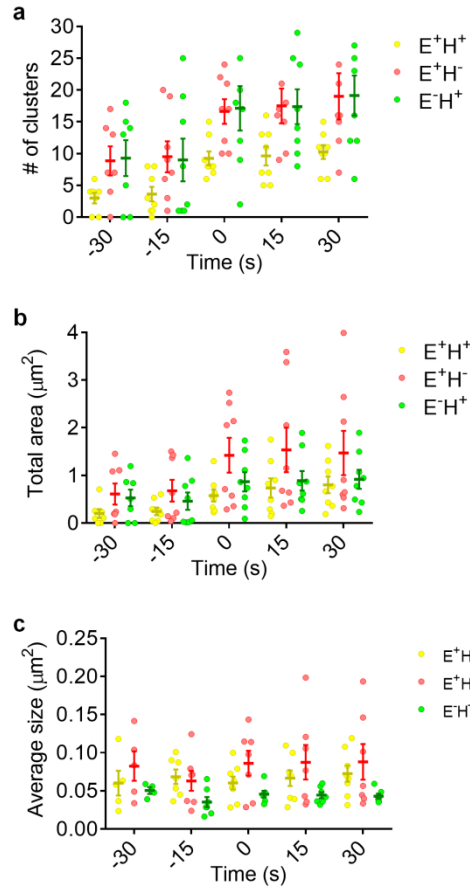

### Supplementary Figure 6

Integrin clusters during neutrophil rolling and arrest on P-selectin, ICAM-1 and IL-8. Number **(a)**, total area **(b)** and average size **(c)** of  $E^+H^+$  (yellow),  $E^+H^-$  (red), and  $E^-H^+$  (green) clusters over 15 seconds ( $n=8$  cells). The mean values (bars) and SEMs (error bars) are presented. Each cell is represented by one dot. Arrest at time = 0 s.



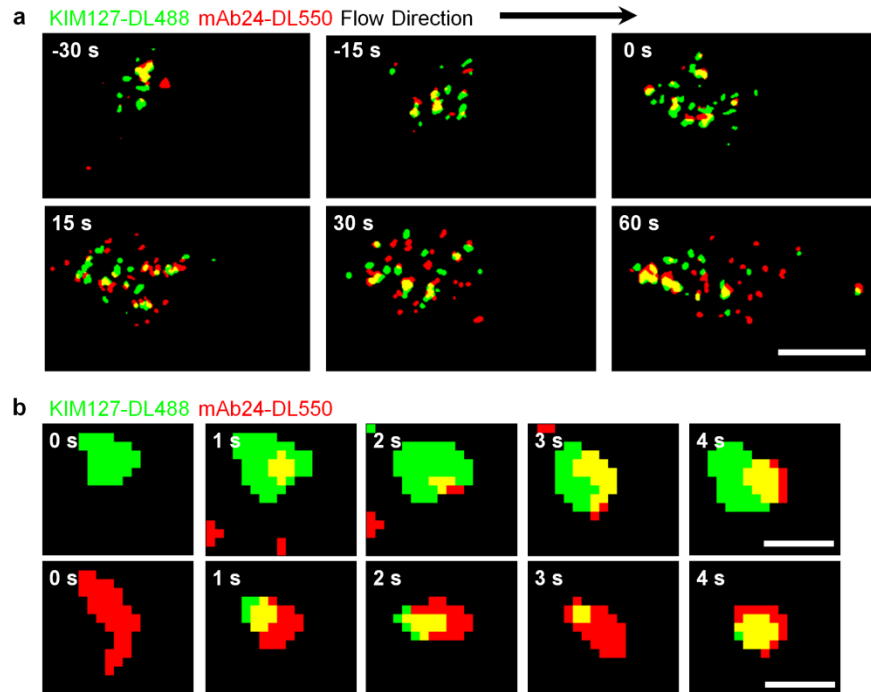

### Supplementary Figure 7

**Switching mAb-conjugations.** (a) The extended conformation of  $\beta_2$  integrins was identified by DL488 conjugated KIM127 (green), and the open headpiece conformation of  $\beta_2$  integrins was identified by DL550 conjugated mAb24 (red). Binary images; Clusters can be identified as  $E^+H^+$  (yellow),  $E^+H^-$  (green) or  $E^-H^+$  (red). The clustering of the  $\beta_2$  integrins and the increase in cluster number for all three antibody combinations were observed, similar to Fig. 1d; scale bar 5  $\mu\text{m}$ . (b) The two pathways of  $\beta_2$  integrin activation were still observed after switching mAb-conjugations:  $E^+H^-$  (green) or  $E^-H^+$  (red) clusters both transitioned to  $E^+H^+$  (yellow) clusters in 4 seconds as shown in Fig. 2a; scale bars 0.5  $\mu\text{m}$ .

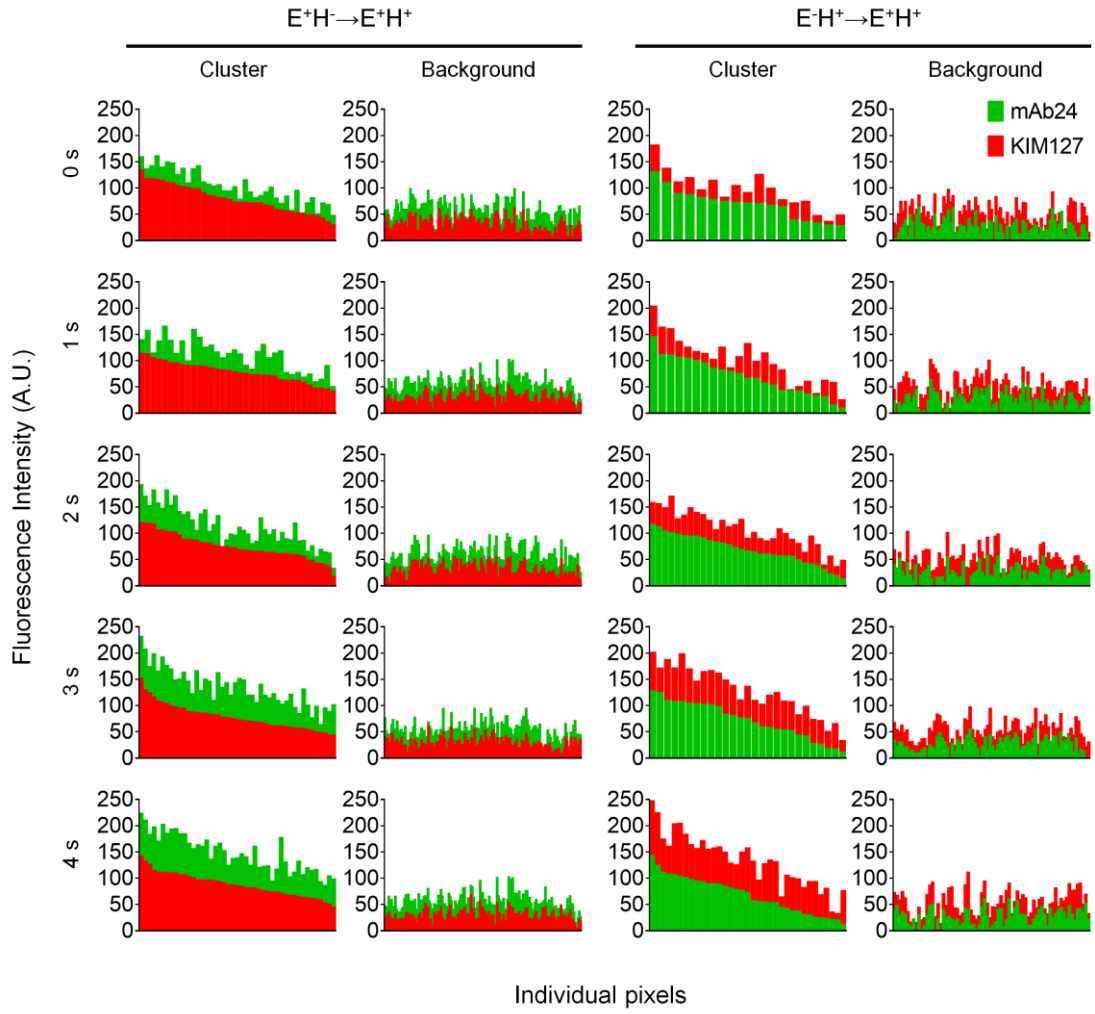

### Supplementary Figure 8

Pixel statistics showing the transitions from one  $E^+H^-$  (left two columns) cluster and one  $E^-H^+$  (right two columns) to  $E^+H^+$  clusters within four seconds. Fluorescence intensities of both KIM127-DL550 and mAb24-DL488 in each individual pixels of clusters or non-cluster background were obtained. The background intensities in both transitions did not vary significantly over time. In the transition from  $E^+H^-$  to  $E^+H^+$  cluster, KIM127-DL550 intensity remained similar, whereas mAb24-DL488 intensity increased. In the transition from  $E^-H^+$  to  $E^+H^+$  cluster, mAb24-DL488 intensity remained similar, whereas KIM127-DL550 intensity increased. Each bar is one pixel.

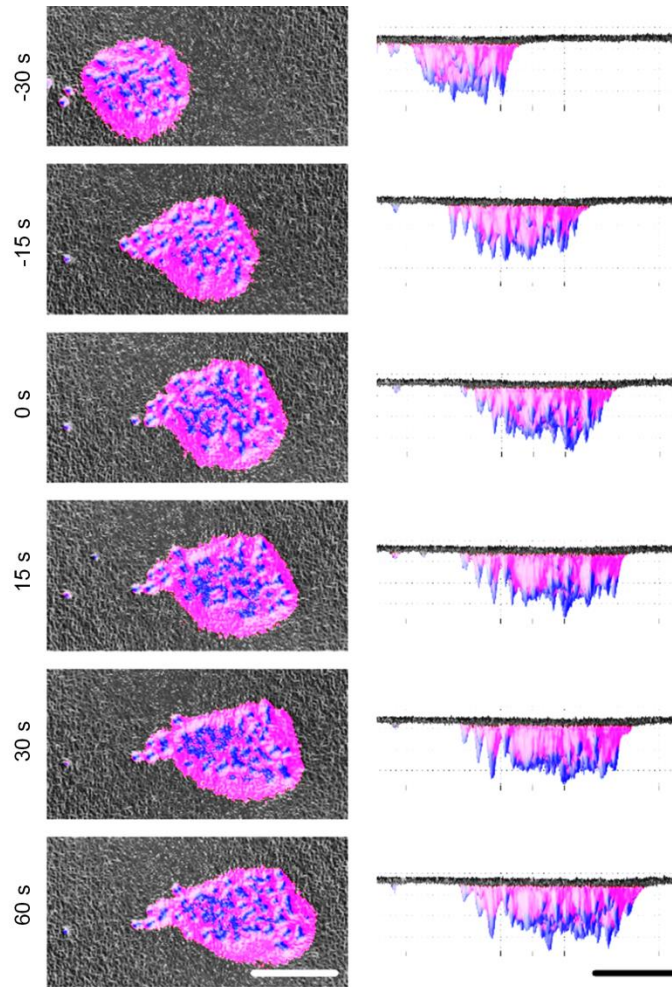

### Supplementary Figure 9

Hills (blue) and valleys (magenta) identified on time-lapse 3D topography of neutrophil footprints during rolling (-30 to 0 second) and arrest (0 to 60 seconds). The hills and valleys were identified using “Smart Segmentation” in ImagePro as described in the experimental procedures section. Top-views (Left row), side-views (right row). Horizontal scale bars 5  $\mu\text{m}$ , vertical scale bar 50 nm.

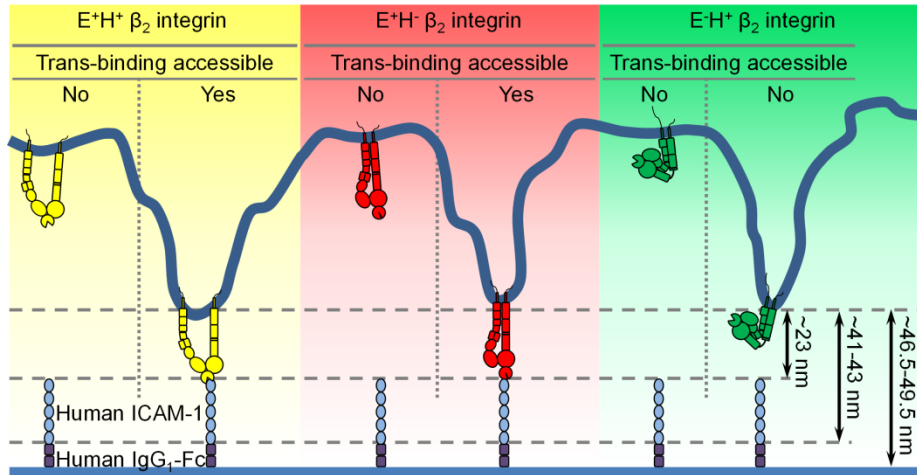

### Supplementary Figure 10

Schematic showing the localization of the  $E^+H^+$  (yellow),  $E^+H^-$  (red), or  $E^-H^+$  (green) integrins accessibility for binding in trans.

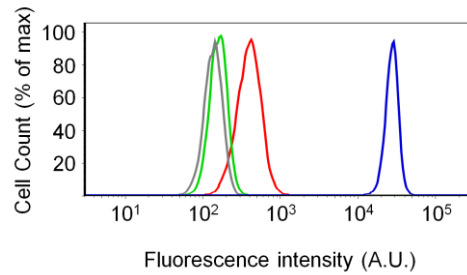

### Supplementary Figure 11

ICAM-1, 2, and 3 expression on human neutrophils assessed by flow cytometry. Parallel samples of human neutrophils ( $10^6$  cells/ml) were incubated with isotype control (10  $\mu$ g/ml), ICAM-1 mAb (HA58, 10  $\mu$ g/ml), ICAM-2 mAb (CBR-IC2/2, 10  $\mu$ g/ml) and ICAM-3 mAb (CBR-IC3/3, 10  $\mu$ g/ml), respectively, at room temperature for 30 minutes. After staining with FITC-conjugated secondary antibody, the expression of ICAM-1, ICAM-2 and ICAM-3 was assessed. ICAM-1 (red) and ICAM-3 (blue) expressed, ICAM-2 (green) near isotype control (gray).

Schematics

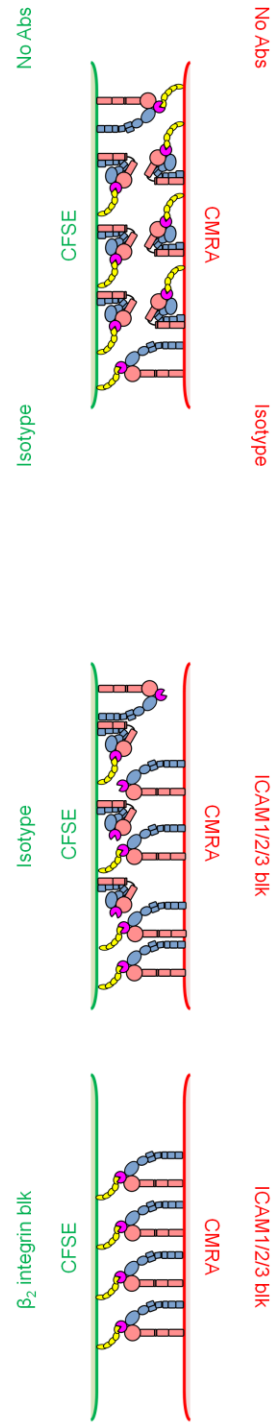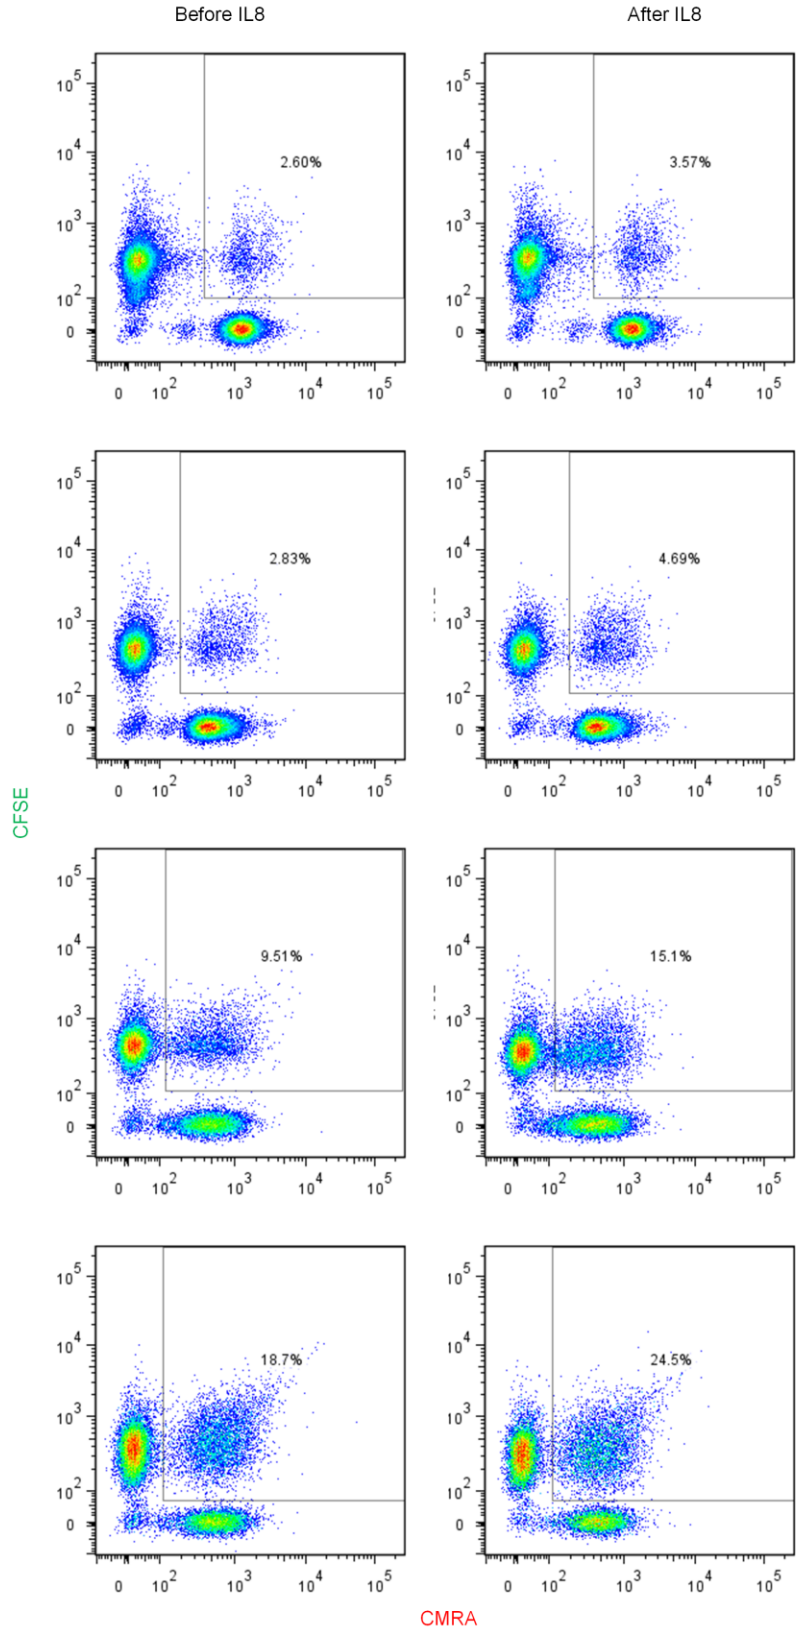

## Supplementary Figure 12

Blocking the cis interactions of E<sup>H</sup><sup>+</sup> integrin with neutrophil ICAMs promotes neutrophil aggregation. Neutrophil suspension from one donor was split in half and labeled with CFSE and CMRA, respectively. Top two rows: when the cis interactions of E<sup>H</sup><sup>+</sup> integrin with ICAMs were not blocked (no Abs and Isotype controls), aggregation between the CFSE and CMRA labeled neutrophils is rare (~2-3% without IL-8, ~4-5% with IL-8). Row three: when the cis interactions of E<sup>H</sup><sup>+</sup> integrin with ICAMs were blocked in one population (CMRA, HA58 and R6.5 for ICAM-1, CBR-IC2/2 for ICAM-2, CBR-IC3/1 for ICAM-3, 10µg/ml each), the aggregation between CFSE and CMRA labeled neutrophils increased (>3fold), to ~9.5% without IL-8 stimulation, and ~15% with IL-8, indicating that more trans bounds are formed when the cis interaction is eliminated. Bottom Row: Further blockade of β<sub>2</sub> integrins on the other (CFSE) population releases more ICAMs for binding in trans, which further increases the CFSE-CMRA neutrophil aggregation to ~19% without IL-8 and ~25% with IL-8.
